# Supplementary material for: Cost-Effectiveness of Chuna Manual Therapy and Usual Care, Compared with Usual Care Only for People with Neck Pain following Traffic Accidents: A Multicenter Randomized Controlled Trial
Source: MDPI journal article supplement (doi:10.3390/ijerph18199994), 2021-09-23
Supplement: s1 [file s1]

Figure S1. CONSORT flow diagram

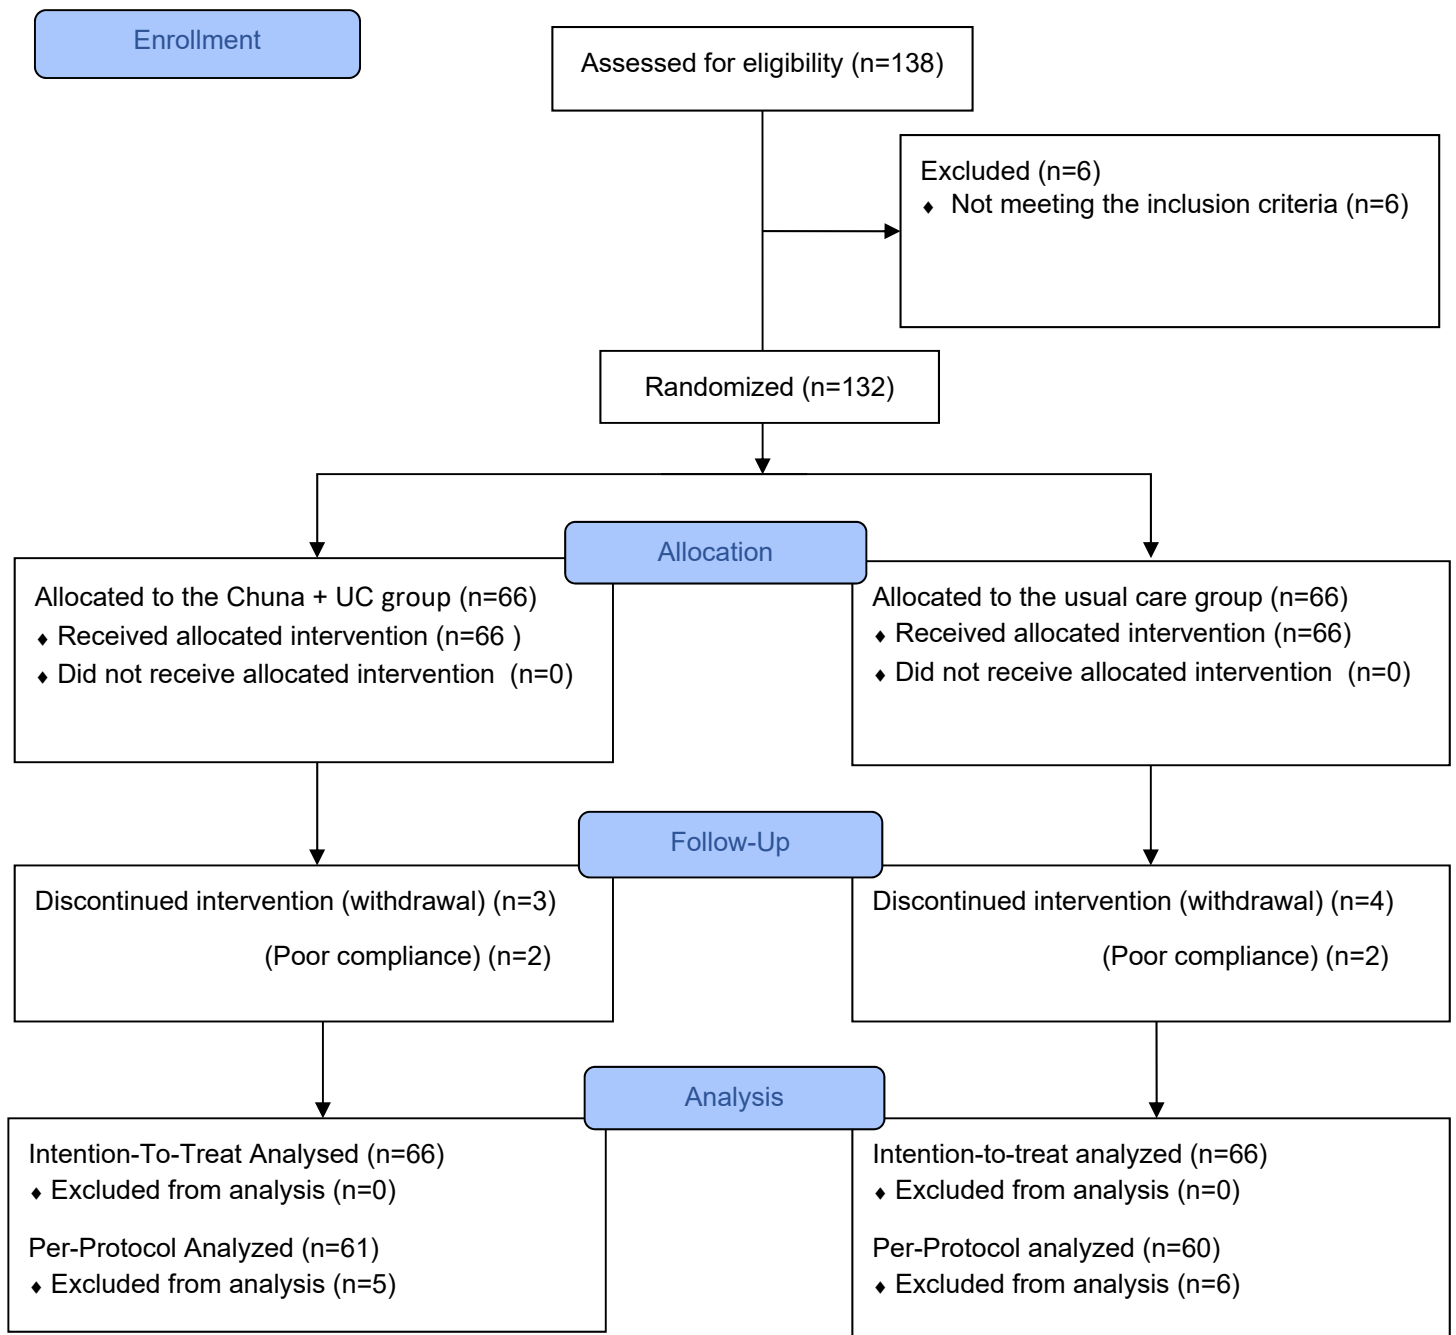

### Supplementary Tables ( Table S1, S2, S3, S4, S5)

Table S1. Baseline characteristics of participants.

| Variables   |        | UC alone<br>(n = 66) | CMT+UC<br>(n = 66) | p value            |
|-------------|--------|----------------------|--------------------|--------------------|
| SEX         | Male   | 24 (36.4)            | 17 (25.8)          | .188 <sup>1)</sup> |
| N (%)       | Female | 42 (63.6)            | 49 (74.2)          |                    |
| Age (years) |        | 40.30 ± 12.13        | 39.61 ± 11.55      | .736 <sup>2)</sup> |
| Height (cm) |        | 166.02 ± 8.39        | 165.20 ± 7.80      | .563 <sup>2)</sup> |
| Weight (kg) |        | 66.12 ± 12.93        | 62.63 ± 12.11      | .112 <sup>2)</sup> |
| BMI         |        | 24.12 ± 3.73         | 22.88 ± 3.56       | .053 <sup>2)</sup> |

<sup>1)</sup> P values were derived from the chi-square test.

<sup>2)</sup> P values were derived from an independent t test for between-group comparisons.

BMI, body mass index; CMT, Chuna manual treatment; UC, usual care

Table S2. EQ-5D-5L utility values at 4 timepoints.

| EQ-5D    | Chuna+Usual Care |       |       | Usual Care |       |       | Difference | BCa 95% CI |       |         |
|----------|------------------|-------|-------|------------|-------|-------|------------|------------|-------|---------|
| Time     | N                | Mean  | SD    | N          | Mean  | SD    | Mean       | Lower      | Upper | P-value |
| Baseline | 61               | 0.799 | 0.049 | 60         | 0.801 | 0.048 | -0.002     | -0.019     | 0.013 | 0.787   |
| 3 weeks  | 61               | 0.828 | 0.044 | 60         | 0.812 | 0.05  | 0.017      | 0.000      | 0.031 | 0.050   |
| 6 weeks  | 61               | 0.835 | 0.053 | 60         | 0.821 | 0.048 | 0.014      | -0.003     | 0.03  | 0.103   |
| 12 weeks | 61               | 0.858 | 0.046 | 60         | 0.828 | 0.052 | 0.03       | 0.013      | 0.045 | 0.001   |

SD: standard deviation; BCa 95% CI: bias-corrected accelerated bootstrap 95% Confidence Interval

Table S3: Unit costs

| Cost category                                       | Unit costs (Int\$) | Source |
|-----------------------------------------------------|--------------------|--------|
| Drug cost per day                                   | 5.39               | [23]   |
| Emergency per day                                   | 129                | [23]   |
| Inpatient care at conventional hospitals per day    | 177.97             | [23]   |
| Inpatient care at Korean Medicine hospitals per day | 177.97             | [23]   |
| Outpatient per day                                  | 65.45              | [23]   |
| Diagnostic tests per day                            | 12.29              | [23]   |
| Minimum wage per hour                               | 10                 | [22]   |

Table S4: Health care service utilization at 4 timepoints

|               |          | Chuna+Usual Care |      |      | Usual Care |      |      | Difference | BCa 95% CI |       |
|---------------|----------|------------------|------|------|------------|------|------|------------|------------|-------|
| Cost category | Time     | N                | Mean | SD   | N          | Mean | SD   | Mean       | Lower      | Upper |
| Drug          | Baseline | 66               | 0.83 | 2.00 | 65         | 1.23 | 2.41 | -0.40      | -1.11      | 0.29  |
|               | 3 weeks  | 61               | 0.07 | 0.31 | 61         | 0.07 | 0.25 | 0.00       | -0.09      | 0.10  |
|               | 6 weeks  | 61               | 0.10 | 0.40 | 60         | 0.05 | 0.22 | 0.05       | -0.06      | 0.16  |
|               | 12 weeks | 58               | 0.19 | 0.74 | 62         | 0.11 | 0.58 | 0.08       | -0.16      | 0.34  |

|                                             |          |    |      |      |    |      |      |       |       |      |
|---------------------------------------------|----------|----|------|------|----|------|------|-------|-------|------|
| Emergency                                   | Baseline | 66 | 0.33 | 0.48 | 65 | 0.40 | 0.55 | -0.07 | -0.24 | 0.10 |
|                                             | 3 weeks  | 61 | 0.02 | 0.13 | 61 | 0.02 | 0.13 | 0.00  | -0.05 | 0.05 |
|                                             | 6 weeks  | 61 | 0.00 | 0.00 | 60 | 0.00 | 0.00 | 0.00  | .     | .    |
|                                             | 12 weeks | 58 | 0.00 | 0.00 | 62 | 0.02 | 0.13 | -0.02 | -0.06 | 0.01 |
| Inpatient care at conventional hospitals    | Baseline | 66 | 0.98 | 2.81 | 66 | 2.30 | 3.41 | -0.68 | -1.75 | 0.48 |
|                                             | 3 weeks  | 61 | 0.00 | 0.00 | 61 | 0.00 | 0.00 | 0.00  | .     | .    |
|                                             | 6 weeks  | 61 | 0.00 | 0.00 | 60 | 0.00 | 0.00 | 0.00  | .     | .    |
|                                             | 12 weeks | 58 | 0.00 | 0.00 | 62 | 0.00 | 0.00 | 0.00  | .     | .    |
| Inpatient care at Korean Medicine hospitals | Baseline | 66 | 2.59 | 5.43 | 66 | 2.45 | 4.56 | 0.14  | -1.60 | 1.89 |
|                                             | 3 weeks  | 61 | 0.00 | 0.00 | 61 | 0.00 | 0.00 | 0.00  | .     | .    |
|                                             | 6 weeks  | 61 | 0.00 | 0.00 | 60 | 0.00 | 0.00 | 0.00  | .     | .    |
|                                             | 12 weeks | 58 | 0.00 | 0.00 | 62 | 0.00 | 0.00 | 0.00  | .     | .    |
| Outpatient                                  | Baseline | 66 | 4.83 | 5.87 | 66 | 5.11 | 6.67 | -0.27 | -2.27 | 1.93 |
|                                             | 3 weeks  | 61 | 0.72 | 1.85 | 61 | 0.74 | 1.83 | -0.02 | -0.70 | 0.60 |
|                                             | 6 weeks  | 61 | 0.70 | 1.60 | 60 | 0.62 | 1.42 | 0.09  | -0.46 | 0.65 |
|                                             | 12 weeks | 58 | 0.81 | 3.73 | 62 | 1.10 | 2.78 | -0.29 | -1.36 | 1.10 |
| Diagnostic test                             | Baseline | 66 | 1.18 | 1.71 | 66 | 1.41 | 1.79 | -0.23 | -0.86 | 0.39 |
|                                             | 3 weeks  | 61 | 0.07 | 0.25 | 61 | 0.08 | 0.33 | -0.02 | -0.12 | 0.08 |
|                                             | 6 weeks  | 61 | 0.08 | 0.42 | 60 | 0.02 | 0.13 | 0.07  | -0.03 | 0.18 |
|                                             | 12 weeks | 58 | 0.07 | 0.41 | 62 | 0.10 | 0.53 | -0.03 | -0.22 | 0.13 |

Table S5: Number of hours lost due to travelling by carers and absenteeism by patients

|                 |          | Chuna+Usual Care |       |       | Usual Care |       |       | Difference | BCa 95% CI |       |
|-----------------|----------|------------------|-------|-------|------------|-------|-------|------------|------------|-------|
| Cost category   | Time     | N                | Mean  | SD    | N          | Mean  | SD    | Mean       | Lower      | Upper |
| Travelling time | Baseline | 54               | 1.85  | 0.76  | 44         | 2.07  | 0.70  | -0.22      | -0.51      | 0.07  |
|                 | 3 weeks  | 61               | 3.10  | 1.59  | 61         | 3.30  | 2.16  | -0.19      | -0.86      | 0.46  |
|                 | 6 weeks  | 61               | 1.17  | 2.79  | 60         | 0.77  | 2.40  | 0.41       | -0.57      | 1.35  |
|                 | 12 weeks | 58               | 1.15  | 4.80  | 60         | 1.29  | 3.09  | -0.14      | -1.53      | 1.69  |
| Absenteeism     | Baseline | 45               | 41.24 | 59.48 | 42         | 68.95 | 82.78 | -27.71     | -59.06     | 1.75  |
|                 | 3 weeks  | 61               | 3.02  | 16.66 | 61         | 9.11  | 33.23 | -6.10      | -16.41     | 2.99  |
|                 | 6 weeks  | 61               | 4.20  | 24.60 | 60         | 7.93  | 28.75 | -3.74      | -13.66     | 6.46  |
|                 | 12 weeks | 58               | 2.90  | 22.06 | 60         | 13.81 | 61.53 | -10.91     | -30.38     | 5.23  |
